# Supplementary material for: Development of a Novel, Potent, and Selective Sialyltransferase Inhibitor for Suppressing Cancer Metastasis
Source: MDPI journal article supplement (doi:10.3390/ijms25084283), 2024-04-12
Supplement: s1 [file s1]

# Development of a Novel, Potent, and Selective Sialyltransferase Inhibitor for Suppressing Cancer Metastasis

Han-En Tsai <sup>1</sup>, Chia-Ling Chen <sup>1</sup>, Tzu-Ting Chang <sup>2</sup>, Chih-Wei Fu <sup>1,3</sup>, Wei-Chia Chen <sup>1,4</sup>,  
Ser John Lynon P. Perez <sup>1,2,5,6</sup>, Pei-Wen Hsiao <sup>7</sup>, Ming-Hong Tai <sup>8,9,10,\*</sup> and Wen-Shan Li <sup>1,2,6,8,11,12,\*</sup>

- <sup>1</sup> Institute of Chemistry, Academia Sinica, Taipei 115, Taiwan;  
racheltsai0713@gmail.com (H.-E.T.); tt710595@gmail.com (C.-L.C.);  
sandisefu@gmail.com (C.-W.F.); cat85002903@gmail.com (W.-C.C.);  
spperez@gate.sinica.edu.tw (S.J.L.P.P.)
- <sup>2</sup> Biomedical Translation Research Center, Academia Sinica, National  
Biotechnology Research Park,  
Taipei 115, Taiwan; mrts70026@gate.sinica.edu.tw
- <sup>3</sup> Department of Chemistry, National Central University, Taoyuan 320, Taiwan
- <sup>4</sup> Department of Chemistry, National Taiwan Normal University, Taipei 106,  
Taiwan
- <sup>5</sup> Department of Applied Chemistry, National Yang Ming Chiao Tung  
University, Hsinchu 300, Taiwan
- <sup>6</sup> Sustainable Chemical Science and Technology, Taiwan International  
Graduate Program, National Yang Ming Chiao Tung University and  
Academia Sinica, Taipei 115, Taiwan
- <sup>7</sup> Agricultural Biotechnology Research Center, Academia Sinica, Taipei 115,  
Taiwan; pwhsiao@gate.sinica.edu.tw
- <sup>8</sup> Doctoral Degree Program in Marine Biotechnology, National Sun Yat-Sen  
University,  
Kaohsiung 804, Taiwan
- <sup>9</sup> Center for Neuroscience, National Sun Yat-Sen University, Kaohsiung 804,  
Taiwan
- <sup>10</sup> Institute of Biomedical Sciences, National Sun Yat-Sen University, Kaohsiung  
804, Taiwan
- <sup>11</sup> Ph.D. Program in Drug Discovery and Development Industry, College of  
Pharmacy,  
Taipei Medical University, Taipei 110, Taiwan
- <sup>12</sup> Department of Medicinal and Applied Chemistry, College of Life Science,  
Kaohsiung Medical University, Kaohsiung 807, Taiwan
- \* Correspondence: minghongtai@gmail.com (M.-H.T.);  
wenshan@gate.sinica.edu.tw (W.-S.L.);  
Tel.: +886-7-5252000 (ext. 5816) (M.-H.T.); +886-2-55728662 (W.-S.L.)

## Supplementary Information

**A**

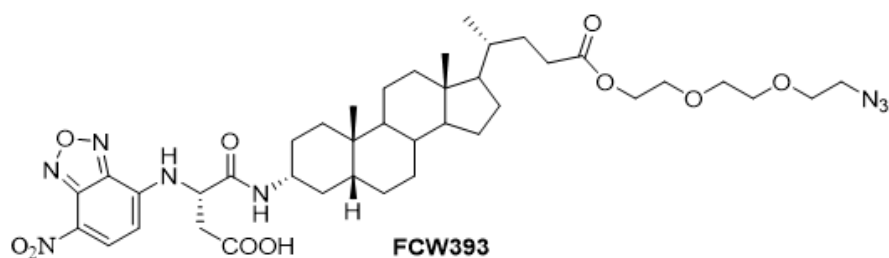

**B**

IC<sub>50</sub> of FCW393 for  $\alpha$ 26N ST

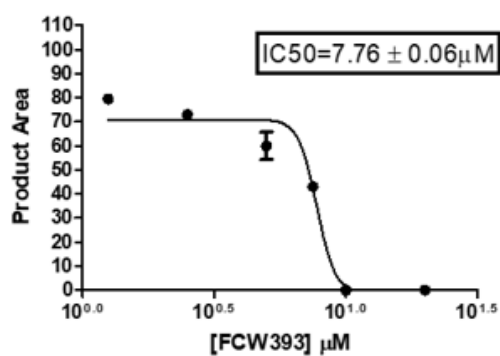

**C**

IC<sub>50</sub> of FCW393 for ST3GAL3(R&D #10554-GT)

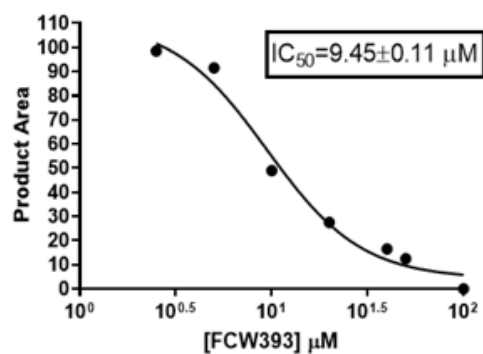

**D**

ST8SIA4 Activity (EA002)

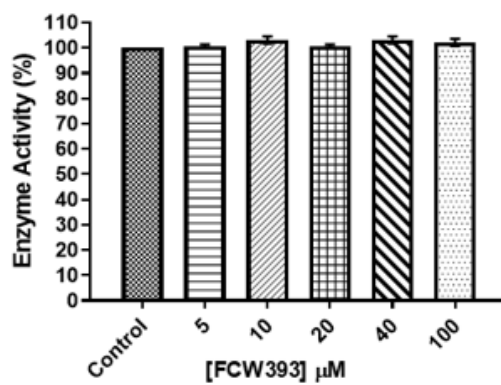

**E**

ST3GAL1 activity

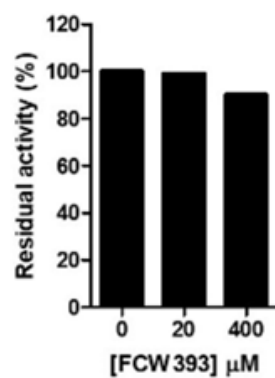

(continued)

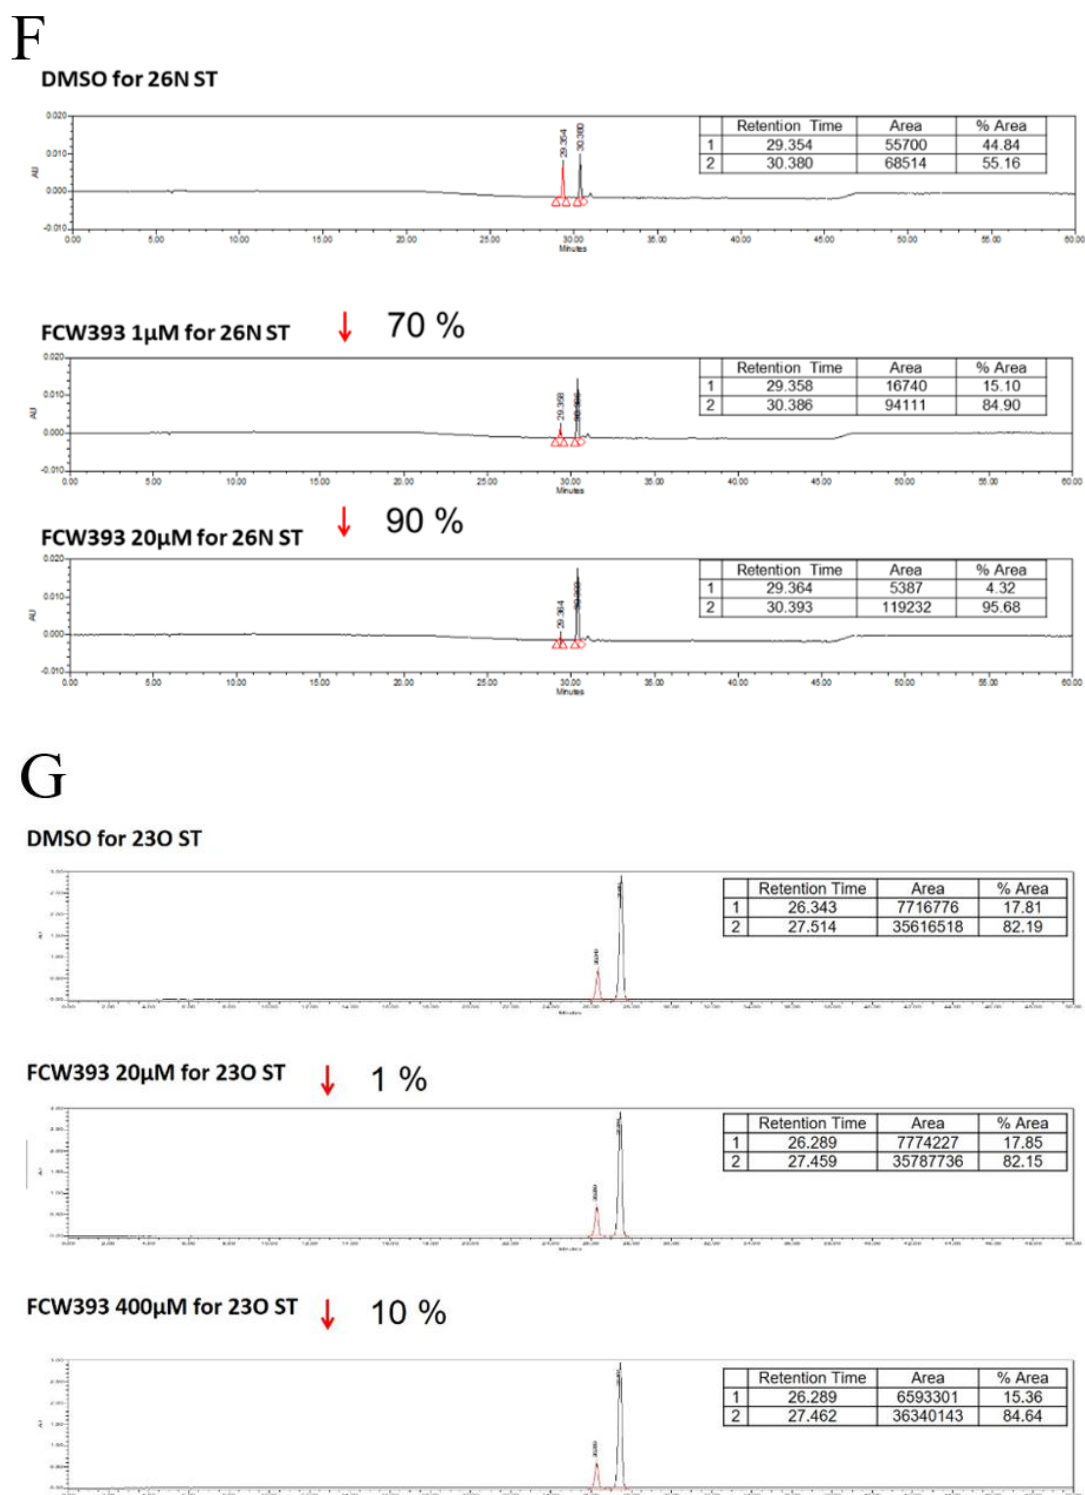

**Figure S1. Sialyltransferase inhibition activity of FCW393.** (A) Chemical structure of FCW393; (B-E) Evaluation of the sialyltransferase inhibition activity of FCW393 on (B) ST6GAL1, (C) ST3GAL3, (D) ST8Sia4 and (E) ST3GAL1 in vitro; (F-G) Representative kinetic data for the inhibition of (F)

ST6GAL1 and (G) ST3GAL1.

The *in vitro* assays for the different ST isozymes were performed as described in the methods section [1]. The data revealed that FCW393 preferentially inhibited both ST6GAL1 ( $\alpha$ 2,6-*N*-linked sialyltransferase) and ST3GAL3 ( $\alpha$ 2,3-*N*-linked sialyltransferase) activities rather than ST3GAL1 ( $\alpha$ 2,3-*O*-linked sialyltransferase) and ST8SIA4 ( $\alpha$ 2,8-*N*-linked sialyltransferase). Chemical structure of FCW393 is depicted in (A).

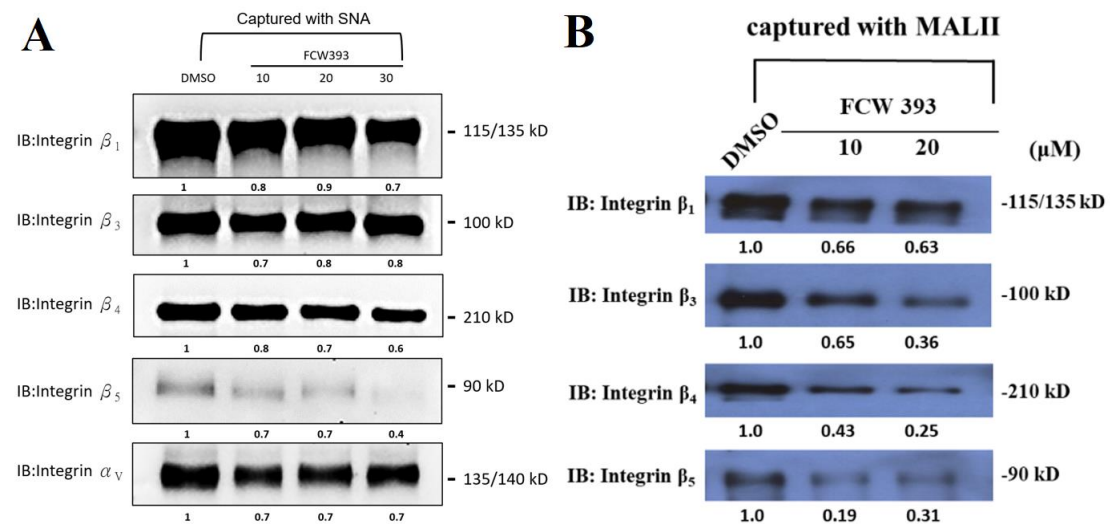

**Figure S2. Inhibition of integrin sialylation by FCW393 in MDA-MB-231 cells**

MDA-MB-231 cells treated with DMSO, FCW393 were harvested at 48 h after treatment. Cellular proteins were incubated with biotinylated (A) *S. nigra* lectin (SNA) or (B) *M. amurensis* lectin II (MAL II). Streptavidin-agarose beads were added to pull down sialylated proteins and the sialylation status was determined.

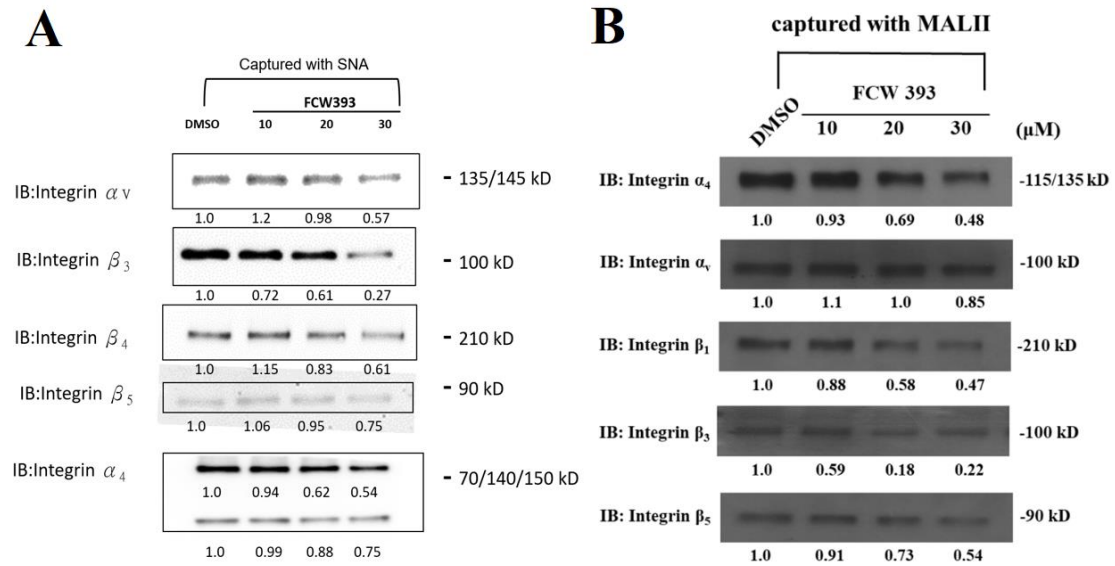

**Figure S3.** Inhibition of integrin sialylation by FCW393 in B16F10 cells

B16F10 cells treated with DMSO or FCW393 (0–30  $\mu$ M) were harvested at 48 h after treatment. Cellular proteins were incubated with biotinylated (A) *S. nigra* lectin (SNA) or (B) *M. amurensis* lectin II (MAL II). Streptavidin-agarose beads were added to pull down sialylated proteins and the sialylation status was determined.

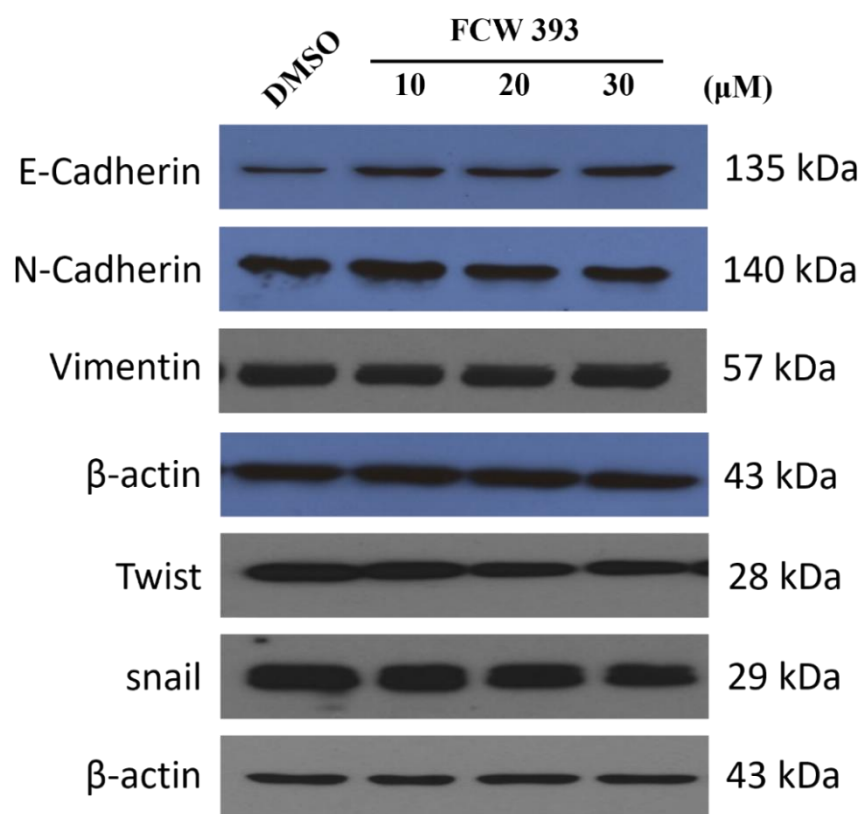

**Figure S4. Effect of FCW393 treatment on the expression of EMT signaling in B16F10 melanoma cells**

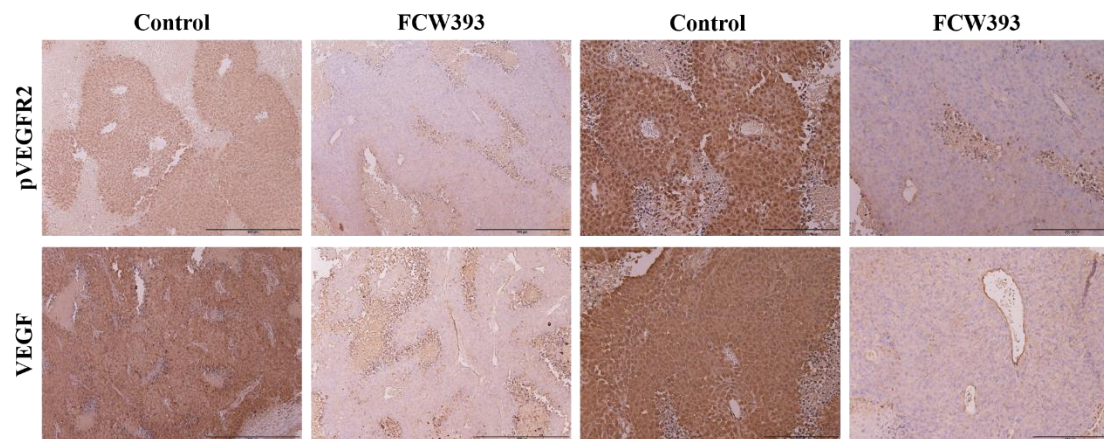

**Figure S5. Effect of FCW393 on VEGFR2 and VEGF expression in B16F10 melanoma**

After the mice were sacrificed, the melanoma tissues were harvested and examined by immunostaining. Immunohistochemical analysis was used to investigate pVEGFR2 (top) and VEGF (bottom) expression level *in vivo*.



## FCW393 significantly inhibited tube formation in HUVEC

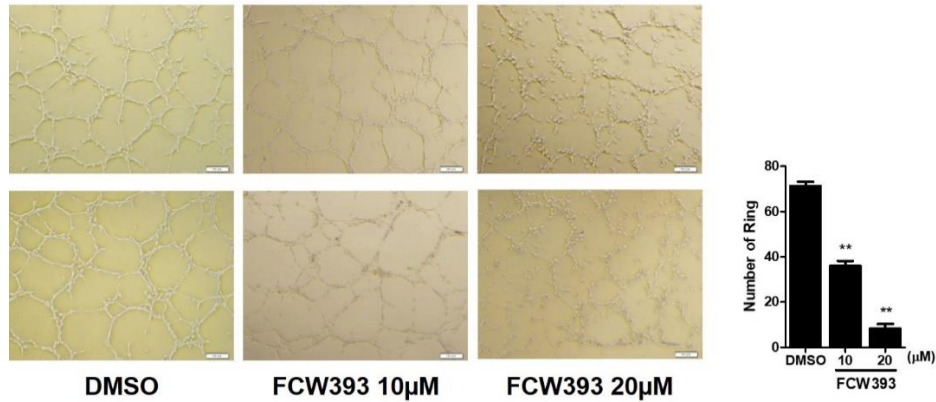

## FCW393 suppressed the migration in HUVEC

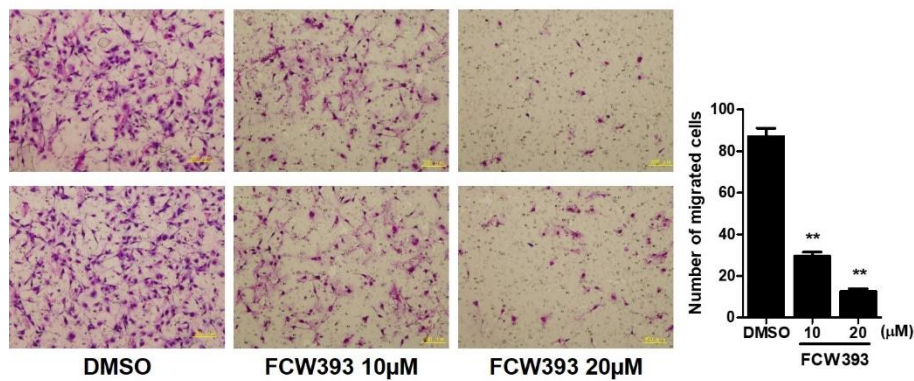

**Figure S6. Effect of FCW393 treatment on the migration and tube formation of HUVECs in vitro**

The *in vitro* tube formation assay was performed as described previously [2].

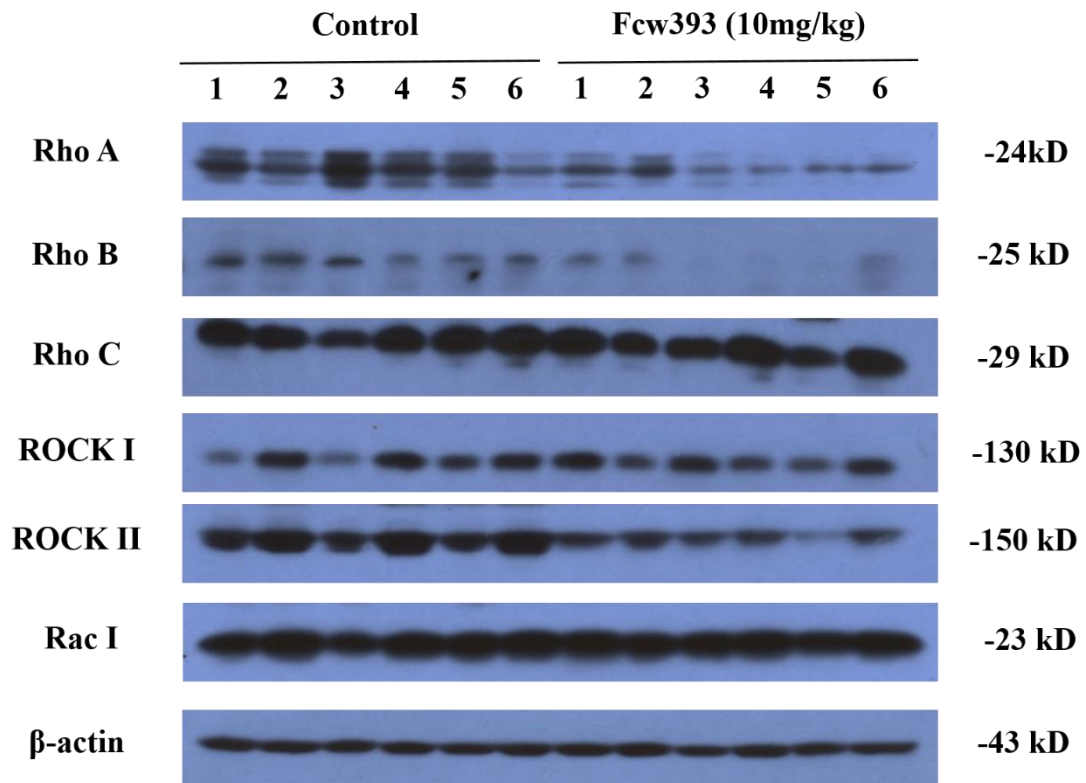

**Figure S7. Effect of FCW393 on Rho-ROCK signaling in B16F10 melanoma**

After the mice were sacrificed, the tumor proteins were harvested and examined by western blot. The RhoA and RhoB expression levels were inhibited by FCW393 treatment. And the Rho down-stream activation factor ROCK-II were also suppressed by FCW393 treatment (n = 6 in each group).

**References:**

1. Fu, C.W.; Tsai, H.E.; Chen, W.S.; Chang, T.T.; Chen, C.L.; Hsiao, P.W.; Li, W.S. Sialyltransferase Inhibitors Suppress Breast Cancer Metastasis. *J. Med. Chem.* **2021**, *64*, 527-542.
2. Chen, J.Y.; Tang, Y.A.; Huang, S.M.; Juan, H.F.; Wu, L.W.; Sun, Y.C.; Wang, S.C.; Wu, K.W.; Balraj, G.; Chang, T.T.; Li, W.S.; Cheng, H.C.; Wang, Y.C. A novel sialyltransferase inhibitor suppresses FAK/paxillin signaling and cancer angiogenesis and metastasis pathways. *Cancer Res.* **2011**, *71*, 473–483.

## Scheme S1. Synthesis of compound FCW393

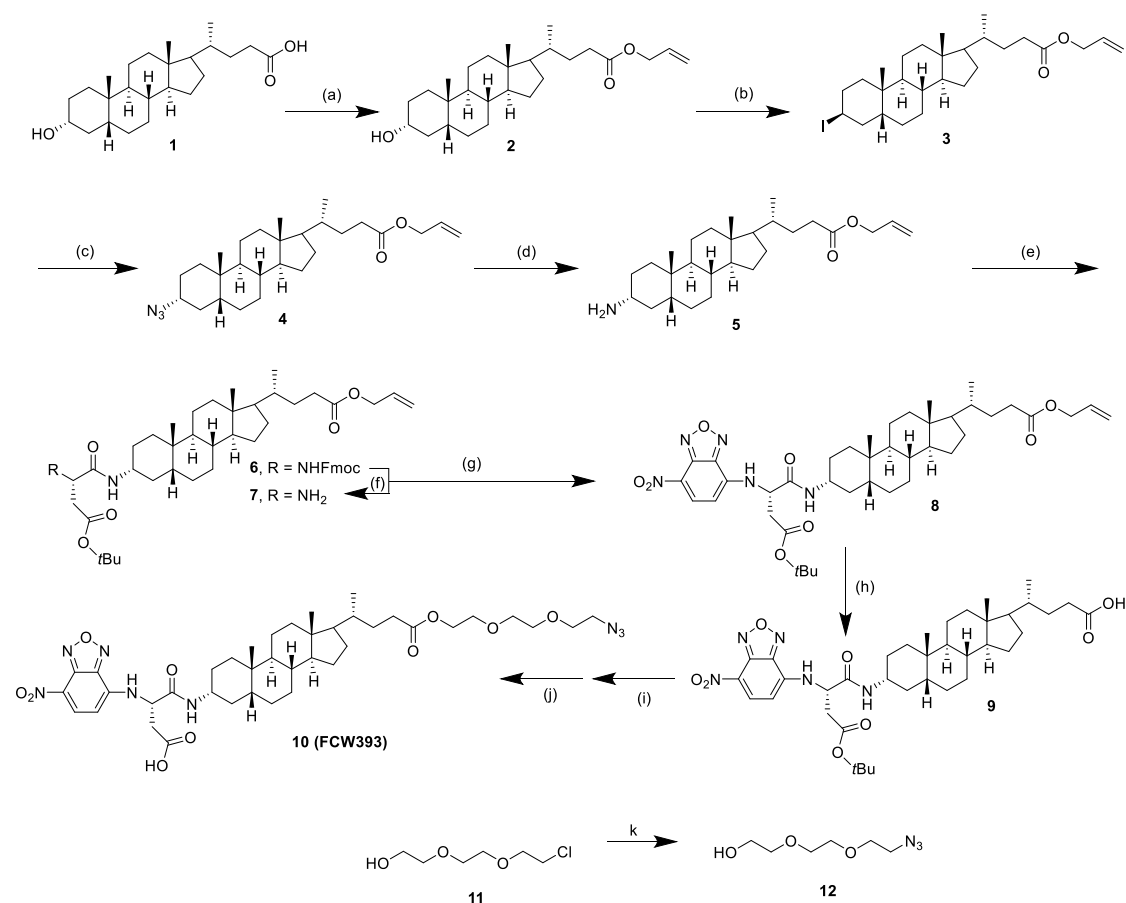

<sup>a</sup> Reagents and conditions: (a) allyl bromide,  $K_2CO_3$ , DMF,  $100^\circ C$ , 12 h; (b)  $I_2$ ,  $PPh_3$ , imidazole,  $CH_2Cl_2$ ,  $0^\circ C$  to rt, 12 h, 74 % ( two steps); (c)  $NaN_3$ , DMF,  $100^\circ C$ , 3 h, 99 %, (d)  $PPh_3$ ,  $THF-H_2O$ , rt, 12 h, 72 %, (e) Fmoc-L-Asp(O-*t*Bu), HBTU, DIPEA,  $CH_2Cl_2$ , rt, 3 h, 93 %, (f) DBU,  $CH_2Cl_2$ , rt, 0.5 h, 92 %, (g) NBD-Cl,  $NaHCO_3$ ,  $THF$ ,  $EtOH$ , rt, 2 d, 42 %, (h)  $Pd(PPh_3)_4$ ,  $PhSiH_3$ ,  $CH_2Cl_2$ , rt, 2 h, 95 %, (i) **12**, DCC, DMAP,  $CH_2Cl_2$ , rt, 6 h, 72 %, (j) TFA,  $H_2O$ ,  $CH_2Cl_2$ , rt, 3 h, 88 %.

Synthesis of **12**:

2-(2-(2-Azidoethoxy)ethoxy)ethanol (**12**)

Yield 90 % (colorless oil),  $^1\text{H}$  NMR (400 MHz,  $\text{CDCl}_3$ ):  $\delta$  3.71-3.66 (m, 4H), 3.63-3.61 (m, 4H), 3.59-3.54 (m, 3H), 3.34 (t,  $J = 4.8$  Hz, 1H), 2.66-2.64 (m, 1H).  $^{13}\text{C}$  NMR (100 MHz,  $\text{CDCl}_3$ ):  $\delta$  72.5, 71.2, 70.5, 70.2, 61.4, 50.6. HRMS calcd for  $\text{C}_6\text{H}_{14}\text{O}_3\text{N}_3$  ( $\text{M} + \text{H}$ ) $^+$ , 176.1035; found, 176.1034.

$^1\text{H}$ - NMR of compound **12**

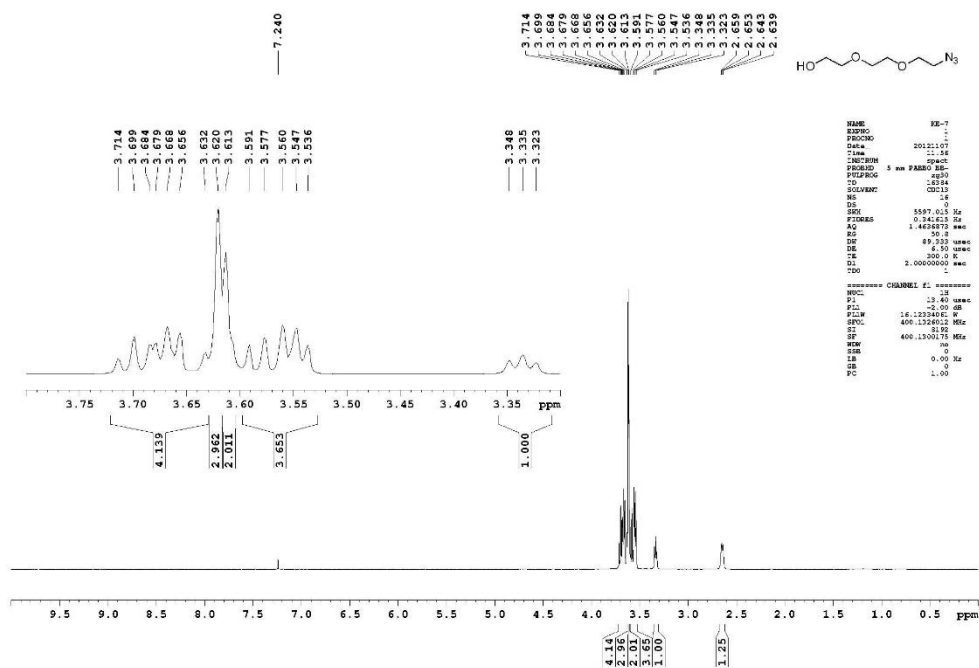

# <sup>13</sup>C-NMR of compound **12**

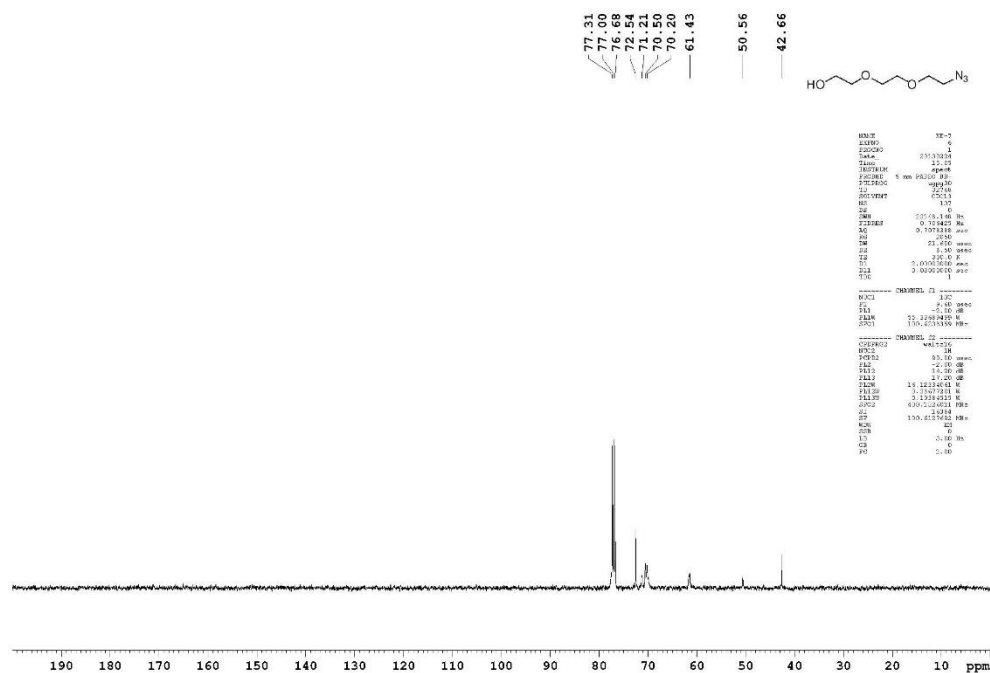

# HRMS of compound **12**

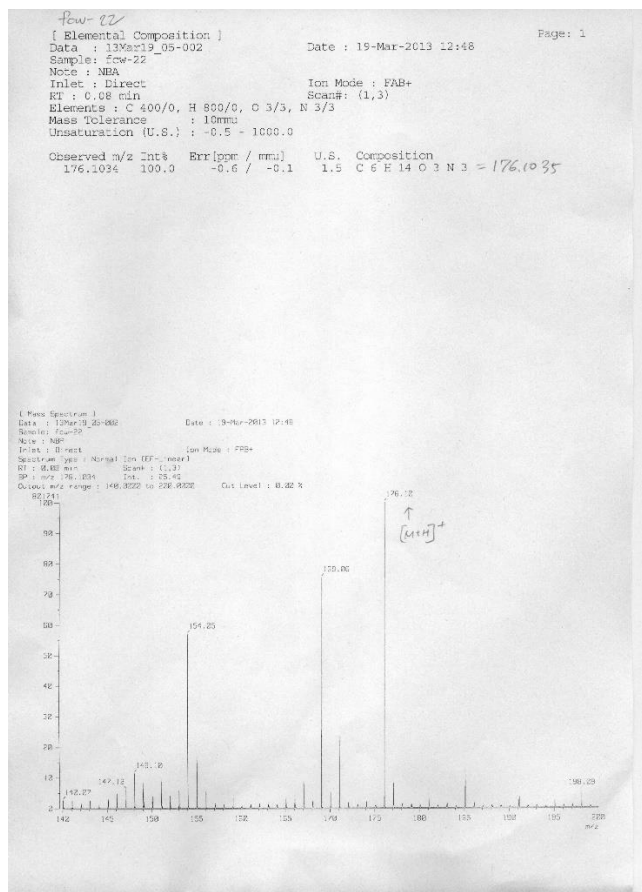

## Synthesis of **FCW393**

(3S)-4-(((3R,5R,10S,13R)-17-((R)-5-(2-(2-(2-Azidoethoxy)ethoxy)ethoxy)-5-oxopentan-2-yl)-10,13-dimethylhexadecahydro-1H-cyclopenta[a]phenanthren-3-yl)amino)-3-((7-nitrobenzo[c][1,2,5]oxadiazol-4-yl)amino)-4-oxobutanoic acid (**FCW393**)

mp 80-81 °C, <sup>1</sup>H NMR (400 MHz, CDCl<sub>3</sub>): δ 8.37 (s, 1H), 7.77 (s, 1H), 7.01 (s, 1H), 6.35 (s, 1H), 4.87-4.76 (m, 1H) 4.21 (s, 2H), 3.80-3.66 (m, 9H), 3.38 (s, 2H), 3.14-3.06 (m, 2H), 2.35-2.30 (m, 1H), 2.23-2.16 (m, 1H), 1.79-1.72 (m, 7H), 1.46-1.09 (m, 13H), 1.02-0.98 (m, 3H), 0.86 (s, 3H), 0.79 (d, *J* = 4.0 Hz, 3H), 0.74-0.67 (m, 3H) 0.53 (s, 3H). <sup>13</sup>C NMR (100 MHz, CDCl<sub>3</sub>): δ 174.8, 173.2, 168.2, 144.3, 143.7, 142.8, 136.4, 124.5, 100.8, 70.6, 70.5, 70.0, 69.2, 63.5, 56.5, 56.1, 54.1, 50.7, 50.4, 42.6, 42.3, 40.4, 40.1, 35.7, 35.6, 35.3, 34.4, 32.9, 31.2, 30.9, 28.1, 27.3, 26.9, 26.2, 24.0, 23.4, 20.7, 18.2, 11.9. HRMS calcd for C<sub>40</sub>H<sub>58</sub>N<sub>8</sub>O<sub>10</sub>Na (M + Na)<sup>+</sup>, 833.4174; found, 833.4181. HPLC purity: >99.5 %.

# <sup>1</sup>H- NMR of compound FCW393

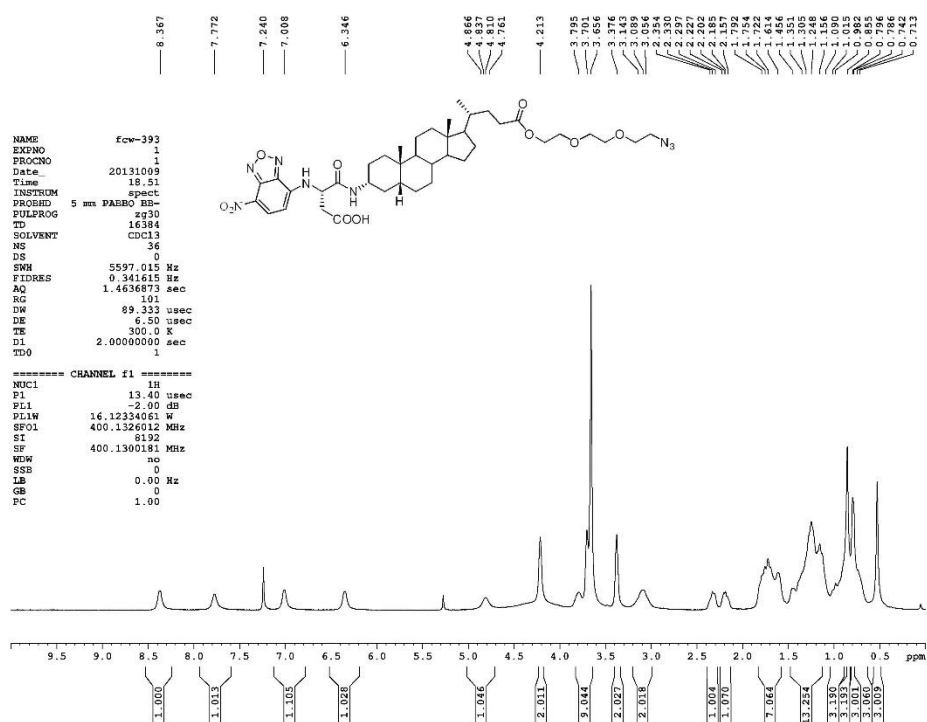

# <sup>13</sup>C-NMR of compound FCW393

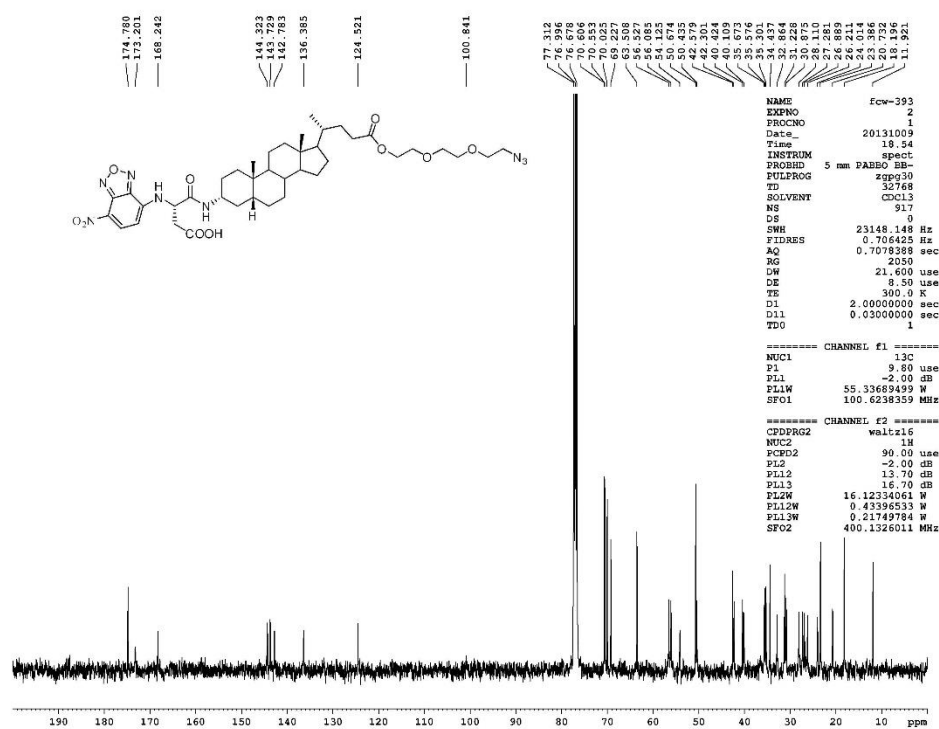



## HRMS of compound FCW393

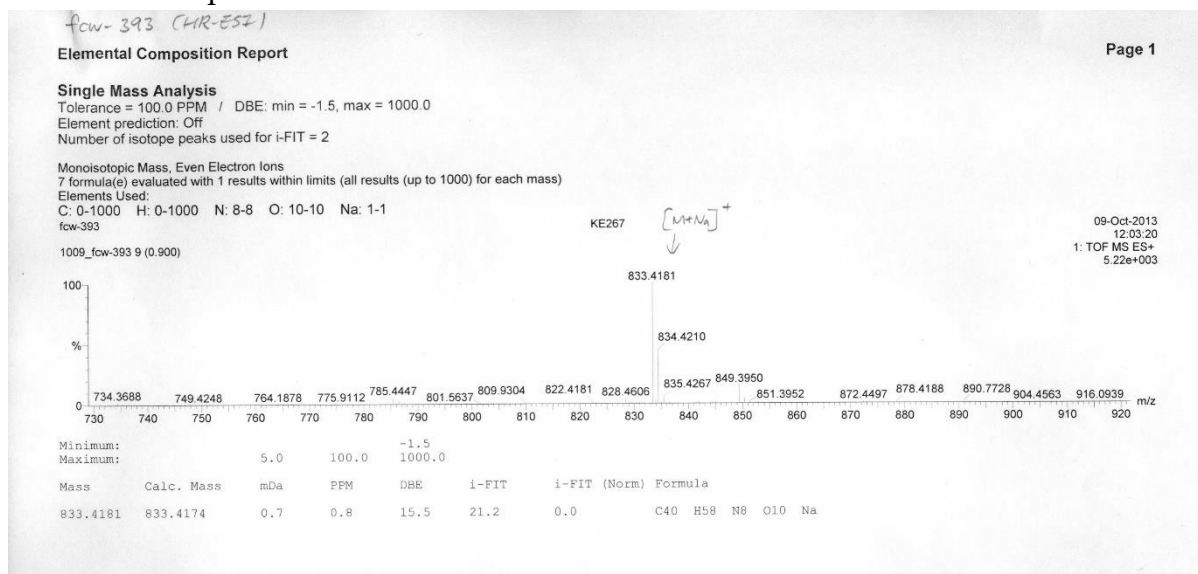

## HPLC purification of compound FCW393

254 nm

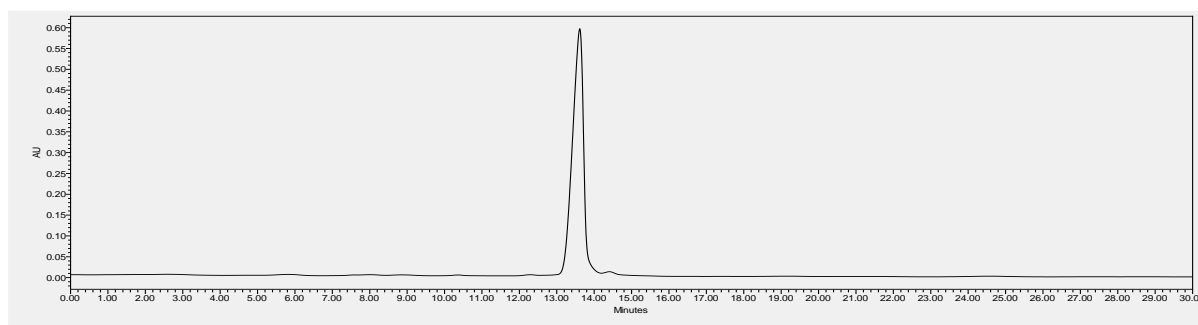

Conditions:

A: H<sub>2</sub>O + 0.1 % TFA

B: ACN + 0.05 % TFA

Flow A: 0.45 ml/min, Flow B: 1.55 ml/min

Isocratic

Retention time: 13.62 min

Column: Kromasil 300-5C4 column
